# Supplementary material for: Preventing the Increase in Lysophosphatidic Acids: A New Therapeutic Target in Pulmonary Hypertension?
Source: MDPI journal article supplement (doi:10.3390/metabo11110784), 2021-11-17
Supplement: s1 [file s1]

## Supplemental Figure S1 :

Chromatograms of rat plasma showing the elution of LPA (A), LPC (B) LPE (C) and MAG (D).

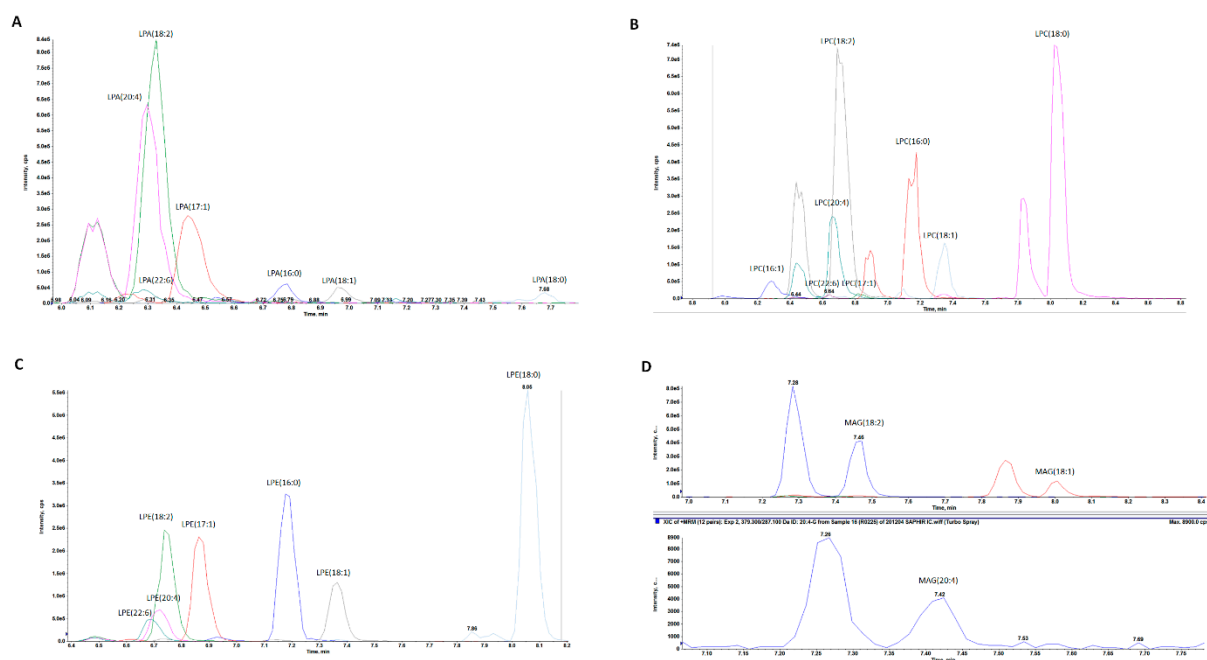

LPA: lysophosphatidic acids; LPC: lysophosphatidylcholine; LPE: lysophosphatidylethanolamine; MAG: monoacylglycerol. All compounds exhibited two peaks corresponding to the position of the esterified fatty acid (1- or 2-) on the glycerol backbone. Annotation corresponds to the integrated compounds (1-acyl lysophospholipid released after the action of phospholipase A<sub>2</sub>).

Supplemental Figure S2 : Calibration curves of the analytical standard of LPA(16:0) ( $r^2=0.998$ , A), LPA(18:1) ( $r^2=0.999$ , B), LPC(16:0) ( $r^2=0.995$ , C), LPC(18:1) ( $r^2=0.995$ , D), LPE(16 :0) ( $r^2=0.990$ , E) and MAG(18:1) ( $r^2=0.999$ , F) performed in a surrogate matrix (sodium chloride 0.9%)

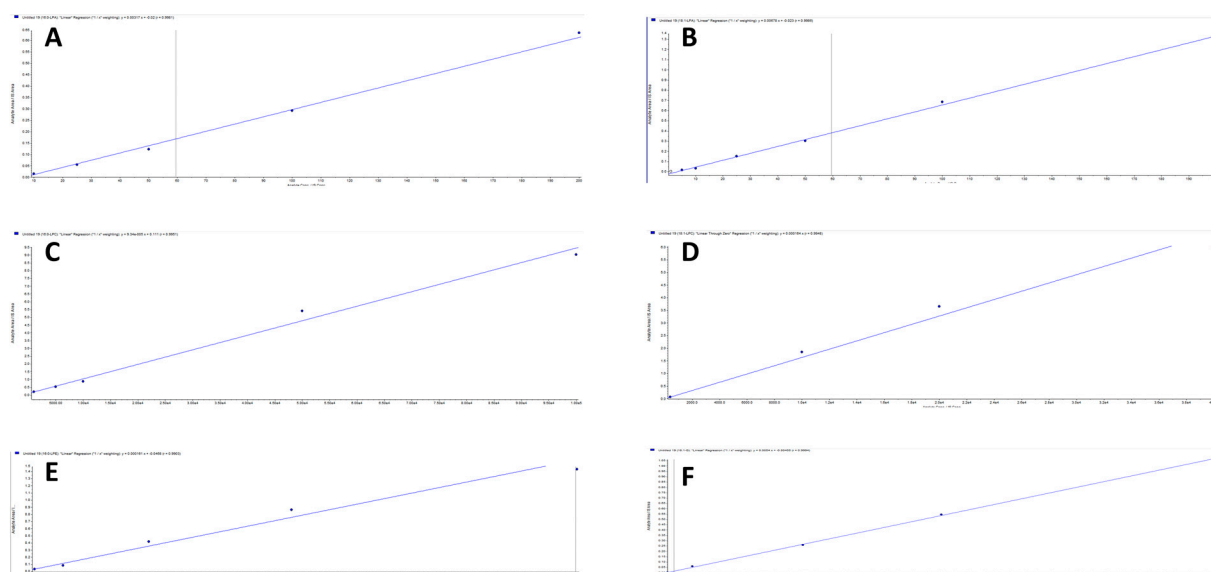

LPA: lysophosphatidic acids; LPC: lysophosphatidylcholine; LPE: lysophosphatidylethanolamine; MAG: monoacylglycerol.

Supplemental Table S1: Repeatability and reproducibility analysis using pooled plasma. Analyses were performed in triplicate on two separate days using compound-to-IS normalized area under curve.

| Analyte.  | Day 1                      | Day 2                      | Overall                    |
|-----------|----------------------------|----------------------------|----------------------------|
|           | Mean $\pm$ sd (CV%)        | Mean $\pm$ sd (CV%)        | Mean $\pm$ sd (CV%)        |
| LPA(16:0) | 0.221 $\pm$ 0.010 (4.5)    | 0.197 $\pm$ 0.028 (14.1)   | 0.209 $\pm$ 0.023 (11.0)   |
| LPA(18:0) | 0.177 $\pm$ 0.020 (11.5)   | 0.154 $\pm$ 0.023 (14.8)   | 0.166 $\pm$ 0.024 (14.1)   |
| LPA(18:1) | 0.121 $\pm$ 0.007 (5.6)    | 0.120 $\pm$ 0.017 (14.0)   | 0.120 $\pm$ 0.011 (9.54)   |
| LPA(18:2) | 2.05 $\pm$ 0.07 (3.3)      | 2.11 $\pm$ 0.26 (12.3)     | 2.08 $\pm$ 0.17 (8.34)     |
| LPA(20:4) | 1.69 $\pm$ 0.077 (4.5)     | 1.94 $\pm$ 0.42 (21.9)     | 1.81 $\pm$ 0.30 (16.8)     |
| LPA(22:6) | 0.150 $\pm$ 0.007 (4.8)    | 0.174 $\pm$ 0.032 (18.5)   | 0.162 $\pm$ 0.025 (15.2)   |
| LPC(16:0) | 16.2 $\pm$ 2.1 (13.3)      | 19.2 $\pm$ 2.0 (10.4)      | 17.7 $\pm$ 2.5 (14.2)      |
| LPC(16:1) | 2.69 $\pm$ 0.37 (13.7)     | 3.43 $\pm$ 0.43 (12.4)     | 3.06 $\pm$ 0.54 (17.6)     |
| LPC(18:0) | 23.2 $\pm$ 3.4 (14.6)      | 23.5 $\pm$ 3.6 (19.5)      | 23.4 $\pm$ 3.6 (15.5)      |
| LPC(18:1) | 6.28 $\pm$ 0.94 (15.0)     | 6.58 $\pm$ 1.14 (17.3)     | 6.43 $\pm$ 0.95 (14.7)     |
| LPC(18:2) | 28.1 $\pm$ 1.99 (7.1)      | 27.0 $\pm$ 5.0 (18.5)      | 27.5 $\pm$ 3.44 (12.5)     |
| LPC(20:4) | 9.25 $\pm$ 1.96 (21.2)     | 9.27 $\pm$ 1.84 (19.8)     | 9.26 $\pm$ 1.70 (18.3)     |
| LPC(22:6) | 0.410 $\pm$ 0.088 (21.3)   | 0.512 $\pm$ 0.211 (48.9)   | 0.461 $\pm$ 0.155 (33.7)   |
| LPE(16:0) | 0.828 $\pm$ 0.019 (2.3)    | 0.776 $\pm$ 0.114 (14.7)   | 0.802 $\pm$ 0.079 (9.8)    |
| LPE(18:0) | 1.27 $\pm$ 0.49 (38.5)     | 1.38 $\pm$ 0.33 (23.8)     | 1.33 $\pm$ 0.38 (28.5)     |
| LPE(18:1) | 0.404 $\pm$ 0.030 (7.5)    | 0.404 $\pm$ 0.038 (9.4)    | 0.404 $\pm$ 0.031 (7.6)    |
| LPE(18:2) | 0.424 $\pm$ 0.095 (22.3)   | 0.369 $\pm$ 0.036 (9.8)    | 0.397 $\pm$ 0.071 (17.9)   |
| LPE(20:4) | 0.208 $\pm$ 0.031 (15.0)   | 0.134 $\pm$ 0.015 (11.3)   | 0.171 $\pm$ 0.04 (26.9)    |
| LPE(22:6) | 0.123 $\pm$ 0.024 (19.8)   | 0.102 $\pm$ 0.031 (29.8)   | 0.113 $\pm$ 0.028 (24.2)   |
| MAG(18:1) | 0.094 $\pm$ 0.029 (30.2)   | 0.079 $\pm$ 0.009 (11.2)   | 0.087 $\pm$ 0.021 (23.8)   |
| MAG(18:2) | 0.671 $\pm$ 0.151 (22.5)   | 0.550 $\pm$ 0.085 (15.5)   | 0.610 $\pm$ 0.128 (21.0)   |
| MAG(20:4) | 0.0085 $\pm$ 0.0016 (18.9) | 0.0070 $\pm$ 0.0023 (32.9) | 0.0078 $\pm$ 0.0020 (25.2) |

CV : coefficient of variation (expressed in %); IS: internal standard; LPA: lysophosphatidic acids; LPC: lysophosphatidylcholine; LPE: lysophosphatidylethanolamine; MAG: monoacylglycerol ; sd: standard deviation.
